# Supplementary figures and images for: Dietary sodium/potassium intake and cognitive impairment in older patients with hypertension: Data from NHANES 2011–2014
Source: PubMed Central journal article supplement — J Clin Hypertens (Greenwich). 2023 May 15;25(6):534–44. doi: 10.1111/jch.14667 (PMC10246459; doi:10.1111/jch.14667), 2023-05-15

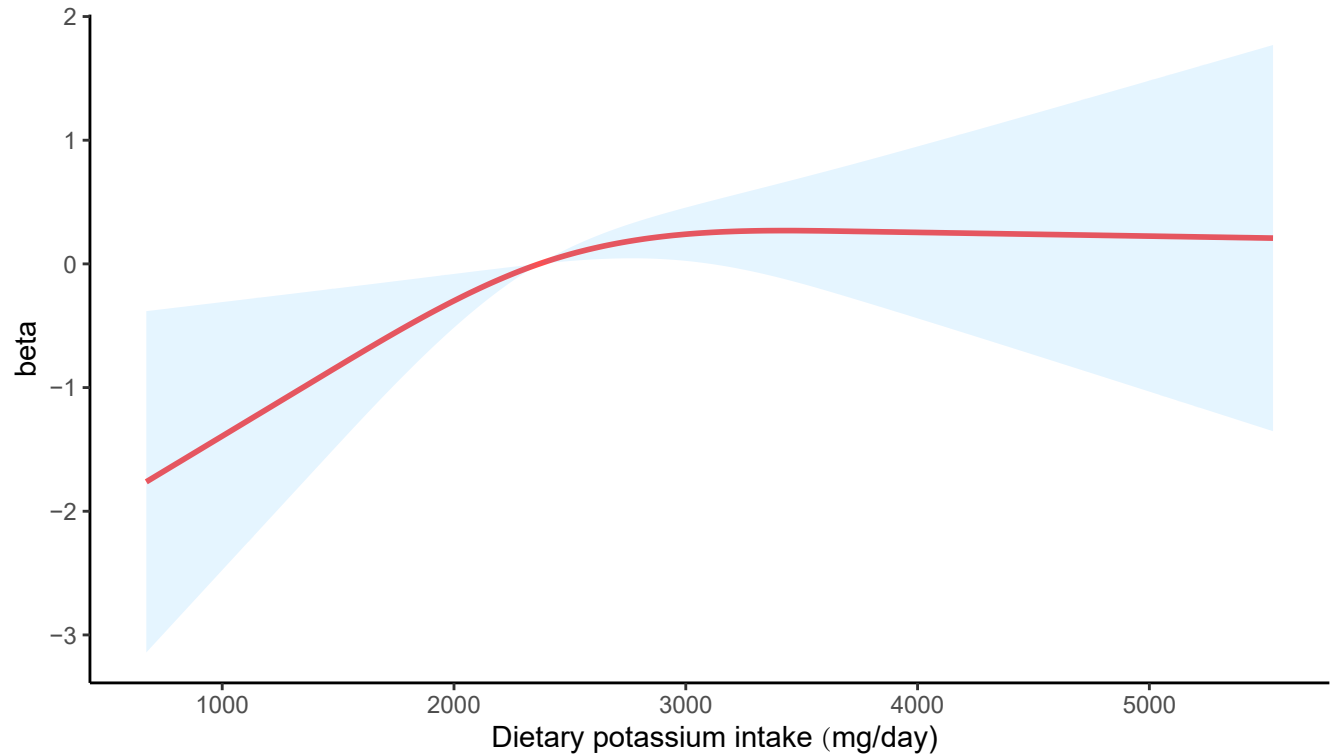

Supplement: JCH-25-534-s001.pdf [file JCH-25-534-s001.pdf]

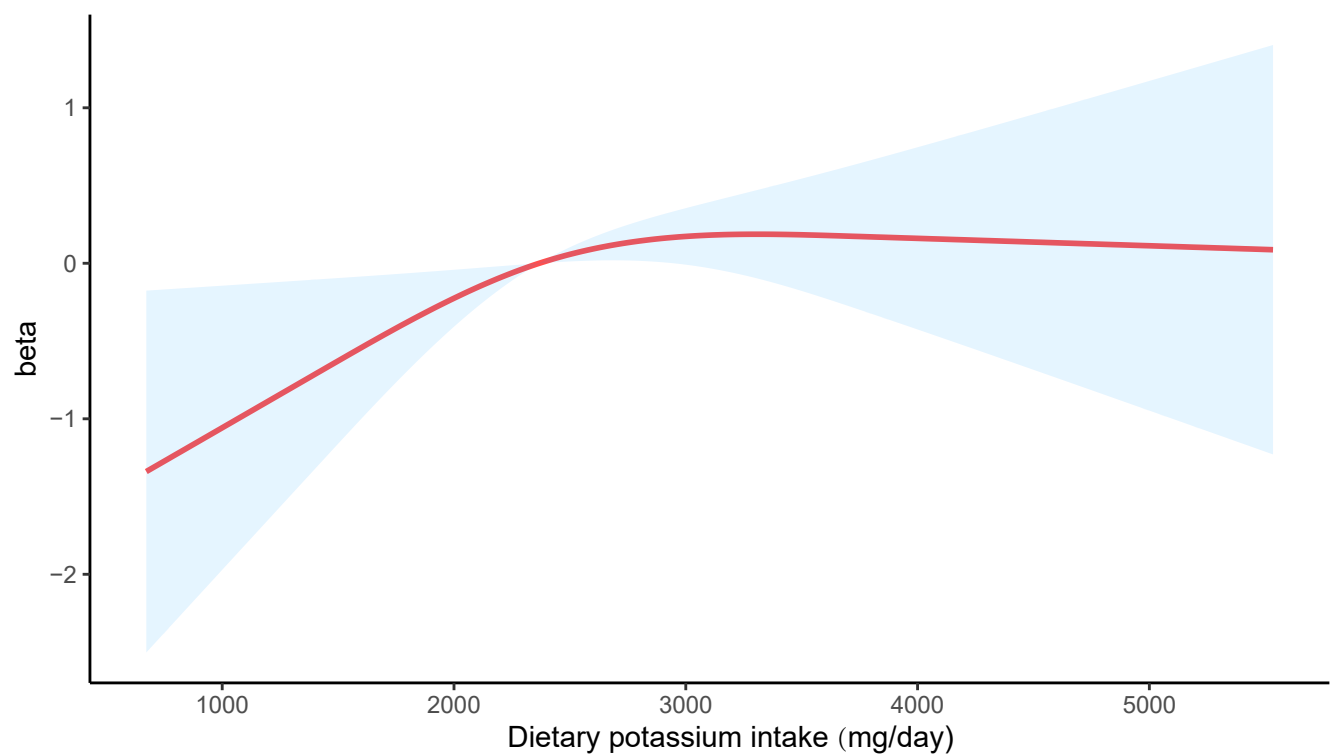

Supplement: JCH-25-534-s002.pdf [file JCH-25-534-s002.pdf]

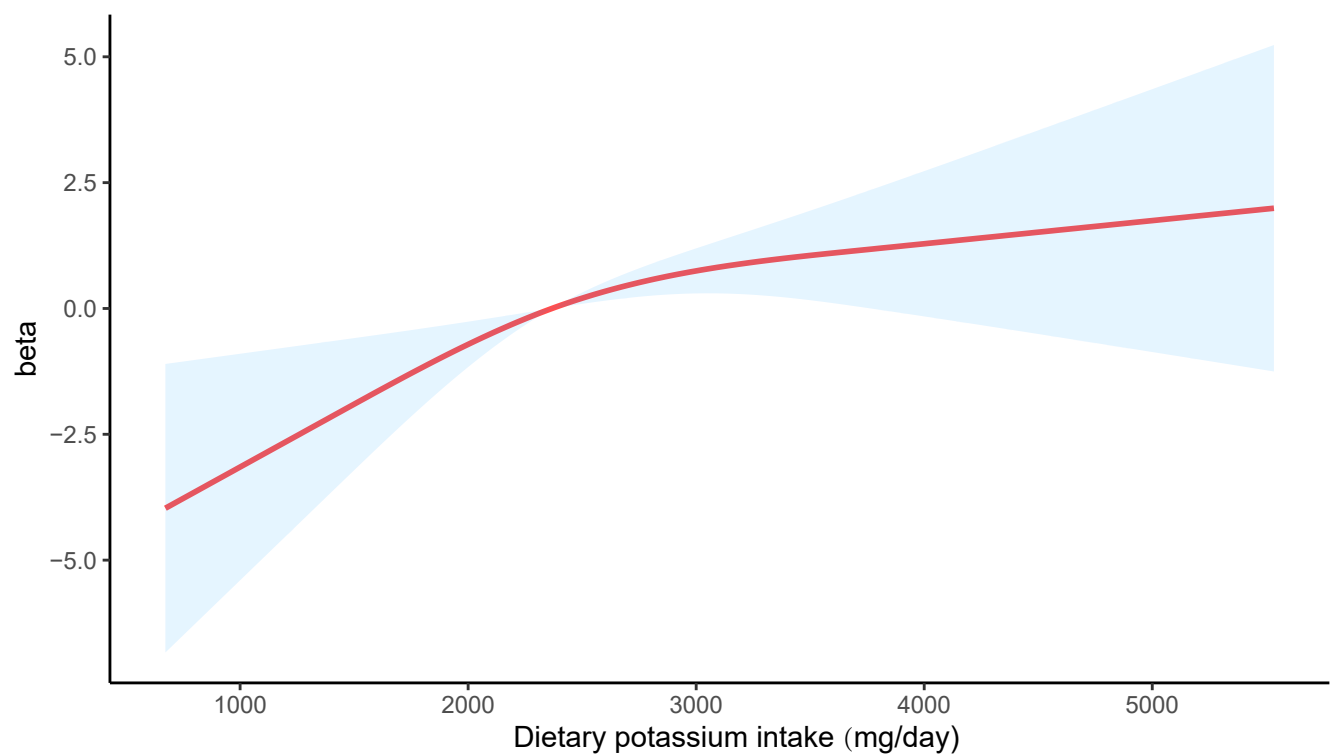

Supplement: JCH-25-534-s004.pdf [file JCH-25-534-s004.pdf]
